# Supplementary material
Source: publisher figshare collection journal article supplement (https://acs.figshare.com/ndownloader/files/34550266)
Supplement: Supplementary file 1 [file 34550266]

## Supporting Information

### Effect of mesophase pitch incorporation on ablation behavior and mechanism of phenolic composites

Yisen Huang, Haoruo Zhang, Xueqin Zhang, Liwei Yan, Youquan Ling, Huawei Zou\*, Yang Chen\*, Mei Liang

(State Key Lab of Polymer Materials Engineering, Polymer Research Institute of Sichuan University, Chengdu 610065, People's Republic of China )

Table. S1. Compositions of samples

| Sample              | Phenolic resin (wt.%) | Mesophase pitch (wt.%) |
|---------------------|-----------------------|------------------------|
| BPR                 | 100                   | 0                      |
| MPBPR <sub>5</sub>  | 95                    | 5                      |
| MPBPR <sub>10</sub> | 90                    | 10                     |
| MPBPR <sub>20</sub> | 80                    | 20                     |

Table. S2. Parameters of the oxyacetylene torch for ablation test

| Heat Flux<br>(MW/m <sup>2</sup> )<br>±10% | Ablation<br>angle (°) | Ablation<br>distance<br>(mm) | Ablation<br>time (s) | Flux (mL/min)  |                               | O <sub>2</sub> / C <sub>2</sub> H <sub>2</sub><br>Ratio (%) | Pressure (MPa) |                               |
|-------------------------------------------|-----------------------|------------------------------|----------------------|----------------|-------------------------------|-------------------------------------------------------------|----------------|-------------------------------|
|                                           |                       |                              |                      | O <sub>2</sub> | C <sub>2</sub> H <sub>2</sub> |                                                             | O <sub>2</sub> | C <sub>2</sub> H <sub>2</sub> |
| 4.1868                                    | 90                    | 10                           | 30                   | 25200          | 18600                         | 1.35                                                        | 0.4            | 0.095                         |

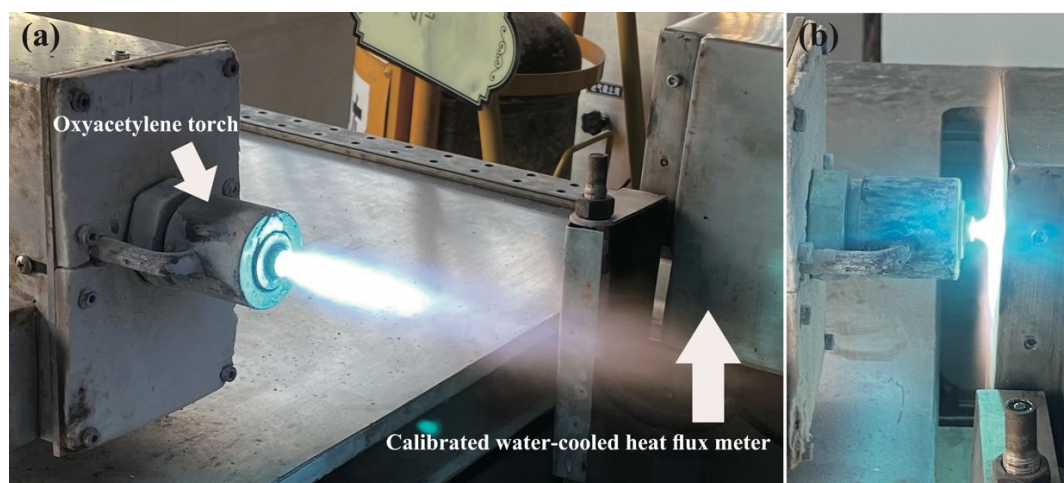

Figure. S1. Photographs of (a) oxyacetylene torch and calibrated water-cooled heat flux meter, (b) measurement of heat flux before the exposure of specimen

\* Corresponding author. Tel: +86-28-85408288; Fax: +86-28-85402465.

E-mail address: [hwzou@163.com](mailto:hwzou@163.com) (Huawei Zou)

\* Corresponding author. Tel: +86-28-85408288; Fax: +86-28-85402465.

E-mail address: [cy3262276@163.com](mailto:cy3262276@163.com) (Yang Chen)

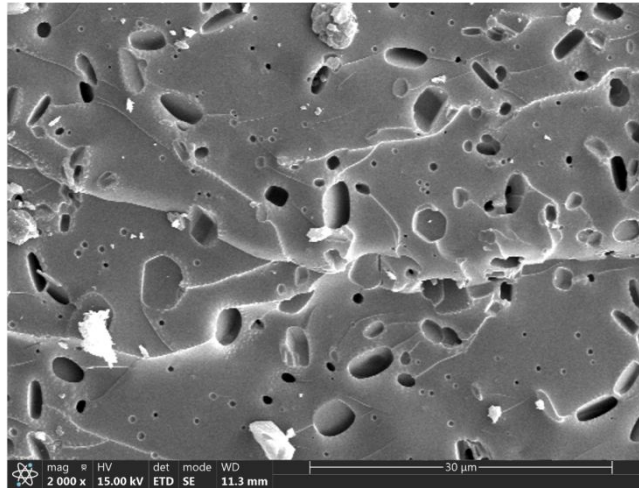

Figure. S2. SEM image of the fracture section of the pyrolysis carbon for BPR

As shown in Fig.S2, the typical brittle fracture surface of glassy carbon for pure phenolic is clearly observed. The fracture morphology of the glassy carbon is very smooth, continuous and isotropic, which contains a large number of pores deriving from the release of the pyrolysis gas.

**(a)**

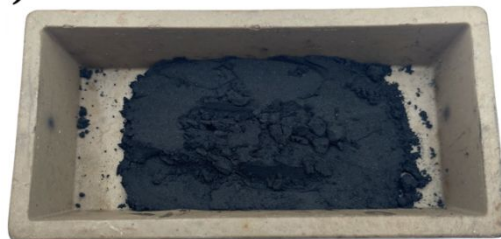

**(b)**

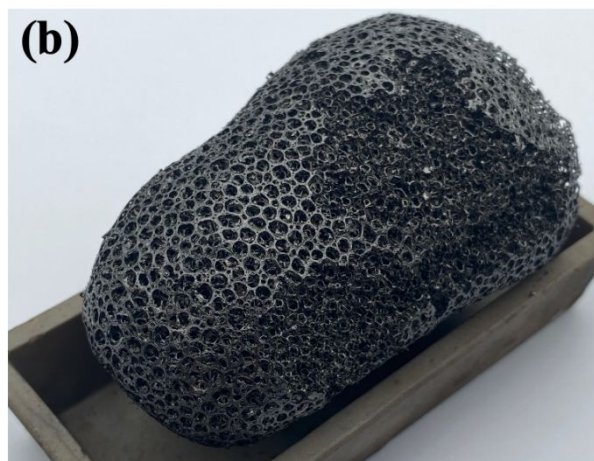

Figure. S3. Optical image of the MP (a) before, (b) after carbonization at 1100°C in a tubular furnace with a heating rate of 5°C/min and dwelling for 1h in a argon atmosphere

As shown in Fig. S3, mesophase pitch itself suffers severe swelling to produce

very porous carbons during carbonization.
